# Supplementary material for: Combined LA-ICP-MS microanalysis of iodine, bromine and chlorine in fluid inclusions
Source: Royal Society of Chemistry journal article supplement (doi:10.1039/c7ja00415j), 2018-01-01
Supplement: c7ja00415j2.xlsx [file c7ja00415j2.xlsx]

## Sheet: AppendixA
Electronic Supplement B
"Combined LA-ICP-MS microanalysis of iodine, bromine and chlorine in fluid inclusions"
T. Fusswinkel, C. Giehl, O. Beermann, J.R. Fredriksson, D. Garbe-Schönberg, L. Scholten, T. Wagner
Analytical data of LA-ICP-MS analysis of synthetic fluid inclusions
(missing values = not detected due to low signals intensities or bad signal quality)
Sample properties				LA-ICP-MS data (µg/g)							1σ uncertainty (Halter et al., 2002) (µg/g)							LOD (Pettke et al., 2012) (µg/g)
Filename	Solution	Sample		Cl	Br (79Br)	Br (81Br)	I	Rb	Cs		Cl	Br (79Br)	Br (81Br)	I	Rb	Cs		Cl	Br (79Br)	Br (81Br)	I	Rb	Cs
16nov30_a10	S1	G5						201	190						4	3						0.022	0.011
16nov30_a11	S1	G5		47720	1166	1054		211	203		1630	92	97		2	2		23	1.4	1.5		0.004	0.002
16nov30_a13-I	S1	G5
16nov30_a13-II	S1	G5		60520	2529	1920		198	164		15420	836	888		9	7		20	1.2	1.3		0.003	0.002
16nov30_a14-I	S1	G5		49380	429	459					650	32	33					119	7.1	7.6
16nov30_a14-II	S1	G5		49830	562	572		178	144		820	44	46		2	1		185	11	11.7		0.031	0.015
16nov30_a15-I	S1	G5
16nov30_a15-II	S1	G5		51450	839	892		146	116		780	41	42		2	1		35	2.1	2.2		0.007	0.004
16nov30_a16	S1	G5		51460	766	790		159	156		1530	85	90		3	2		54	3.2	3.5		0.009	0.005
16dec01_a09	S1	G1						198	187						3	2						0.004	0.002
16dec01_a10	S1	G1		45430	1005	958		171	173		1560	80	83		2	1		11	0.6	0.7		0.002	0.001
16dec01_a11	S1	G1						207	194						2	1						0.001	0.001
16dec01_a12	S1	G1		53480	1523	1366		183	177		4040	219	233		4	3		39	2.2	2.3		0.007	0.003
16dec01_a14	S1	G3						168	178						6	5						0.03	0.014
16dec01_a16	S1	G3		47250	940	904		195	186		760	39	41		1	1		19	1.1	1.1		0.002	0.001
16dec01_a20	S1	G3		68930	1726	1775		187	179		3080	160	168		3	3		27	1.5	1.6		0.003	0.001
16dec01_a21	S1	G3		60820	1518	1690		199	199		3010	158	165		3	2		18	1	1.1		0.002	0.001
16nov30_a25	S2	G6						184	172						8	7						0.006	0.005
16nov30_a26	S2	G6						225	206						16	13						0.006	0.003
16dec01_a24	S2	G4		120490				198	191		2060				2	2		8				0.001	0.001
16dec01_a25	S2	G4		135030	3960	3226		168	195		8060	378	392		6	5		8	0.4	0.4		0.001	0.001
16dec01_a26	S2	G4		115120				206	202		1160				2	1		14				0.002	0.001
16dec01_a28	S2	G4		138190	2618	2804		207	198		5440	288	302		4	3		17	0.9	1		0.002	0.001
17jul03_a13	S3	G7		51990	1014	923	30.9	180	183		4130	152	166	6.5	4	3		74	2.8	3.1	0.1	0.01	0.005
17jul03_a14	S3	G7		34900	957	1219		177	177		8490	326	354		5	4		49	1.8	2.1		0.007	0.003
17jul03_a19	S3	G7		44080	1371	1323	24.4	140	123		750	29	31	1.1	1	1		69	2.6	3	0.1	0.008	0.004
17jul03_a20	S3	G7		50440	2063	1950	28.1	176	145		2820	107	118	4.5	3	2		158	5.7	6.5	0.3	0.021	0.011
17jul03_a22-I	S3	G7		70360	1511	1235	36.1	139	150		6160	228	247	9.2	7	5		186	6.7	7.5	0.3	0.026	0.015
17jul03_a23	S3	G7		54920	2179	1906		183	182		2710	102	107		3	2		32	1.1	1.3		0.005	0.002
17jul03_a24	S3	G7		54890	1200	1134	28	168	150		2000	71	78	3.1	2	2		97	3.5	4	0.2	0.014	0.005
17jul03_a29	S3	G7		45280	1843	1805		184	184		4450	165	179		3	2		71	2.5	2.8		0.011	0.004
17jul04_a13	S3	G7		56280	1680	1687	19.4	152	121		310	12	13	0.3	1	1		128	5	5.7	0.2	0.019	0.009
17jul04_a15	S3	G7		46410	1975	1759		185	167		3290	134	147		3	2		40	1.6	1.8		0.006	0.002
17jul04_a16	S3	G7		51600	2253	1862		180	175		7550	315	340		4	3		57	2.1	2.4		0.008	0.004
17jul04_a17	S3	G7		41390	1418	1352	26.3	187	165		2680	104	111	4.2	3	2		44	1.7	1.9	0.1	0.007	0.003
17jul04_a18-I	S3	G7		44780	1832	1791		197	185		3890	154	165		3	2		27	1	1.2		0.003	0.002
17jul04_a18-II	S3	G7		60340	1541	1501		193	180		7630	306	330		6	4		57	2.2	2.4		0.007	0.004
17jul04_a19	S3	G7		37650	1662	1478		183	182		2450	97	104		2	2		27	1	1.1		0.004	0.001
17jul04_a21	S3	G7		43760	1807	1795		183	182		3560	139	148		3	2		28	1.1	1.2		0.004	0.002
17jul04_a23	S3	G7		54620	2035	1904	30.2	122	126		2690	106	114	4.2	3	2		140	5.3	5.9	0.2	0.023	0.007
17jul04_a26	S3	G7		42220	1397	1662	30.5	179	177		6000	231	251	9.9	5	4		134	5	5.6	0.2	0.02	0.009
17jul04_a27	S3	G7		60820	1914	1732	28.7	207	194		4610	177	190	7.3	6	4		255	9.7	10.5	0.4	0.042	0.019
17jul04_a28	S3	G7		51810	1967	1905	26.6	173	167		3860	154	163	6.3	3	3		47	1.7	1.9	0.1	0.008	0.004
17jul06_a21	S3	G9		47330	1931	1731		199	205		4080	235	247		3	3		15	0.8	0.9		0.002	0.001
17jul06_a22	S3	G9		39100	1873	2031		198	200		1940	109	112		2	1		11	0.6	0.7		0.002	0.001
17jul06_a26	S3	G9		61940	2044	2001		208	208		5500	305	321		3	2		14	0.8	0.8		0.002	0.001
17jul06_a27	S3	G9		42130	1460	1582	27.6	148	236		2010	112	116	9.3	2	2		21	1.2	1.3	0.1	0.004	0.002
17jul06_a28	S3	G9		43360	2230	1831	25.1	199	194		2640	156	164	12.6	2	2		24	1.3	1.4	0.1	0.004	0.002
17jul06_a29	S3	G9		42580	1035	909		192	189		2640	146	155		3	3		54	2.9	3.2		0.008	0.004
17jul06_a30	S3	G9		58420	1635	1968	24.9	192	194		3190	183	187	15.1	2	2		8	0.4	0.5	0	0.001	0.001
17jul06_a32	S3	G9		46930	1683	1785	23.1	201	191		1680	89	93	7.8	2	1		15	0.8	0.9	0.1	0.002	0.001
17jul06_a36	S3	G9		54180	1924	1618		143	142		3610	181	195		4	3		28	1.4	1.5		0.005	0.003
17jul06_a38	S3	G9		47910	1882	1409		194	187		5790	313	329		4	3		12	0.6	0.7		0.001	0.001
17jul06_a39	S3	G9		46270	1970	1788		210	215		5450	280	291		4	3		10	0.5	0.5		0.001	0.001
17jul06_a40	S3	G9		45720	1725	1870		201	196		3410	179	186		3	2		11	0.5	0.6		0.002	0.001
17jul06_a41	S3	G9		42000	2045	1737		195	187		6270	321	348		4	3		48	2.4	2.7		0.007	0.003
17jul04_b14	S4	G8		159820	3835	4137		175	162		4690	170	180		4	3		63	2.2	2.4		0.009	0.004
17jul04_b16	S4	G8		162010	3470	3612		146	132		2720	102	107		2	2		93	3.3	3.6		0.014	0.007
17jul05_a13	S4	G8		117440	4891	5038	72.9	179	162		1430	94	100	5.8	2	1		168	9.5	10.7	0.8	0.019	0.007
17jul05_a16	S4	G8		159600	5455	5101		202	194		5220	341	355		4	3		38	2.2	2.4		0.005	0.002
17jul05_a24	S4	G8		125040	2742	2966	75.1	204	189		4330	224	237	17.6	4	3		97	5	5.5	0.4	0.012	0.007
17jul05_a25	S4	G8		169430	5248	4226	75.4	207	208		3550	188	185	12	5	4		115	6	6.6	0.5	0.018	0.007
17jul05_a29	S4	G8		113430				166	160		9100				5	4		46				0.006	0.003
17jul05_b13	S4	G8		159190	4555	4482	80.7	169	179		3520	124	130	5.1	4	3		248	8.6	9.3	0.4	0.033	0.018
17jul05_b17	S4	G8						151	134						12	9						0.023	0.01
17jul05_b18	S4	G8		116270	4756	4742	75.5	163	157		2490	93	97	3.7	3	2		85	3	3.2	0.1	0.012	0.006
17jul05_b23	S4	G10		188780	4225	4463	90.9	194	181		2930	104	108	4.3	3	2		105	3.6	3.9	0.2	0.013	0.007
17jul05_b24	S4	G10		184420	2712	2790	72.8	212	246		1290	44	46	1.8	2	1		31	1.1	1.2	0.1	0.004	0.002
17jul05_b25	S4	G10		154010	3797	3935		197	196		1660	60	62		1	1		12	0.4	0.5		0.002	0.001
17jul05_b26	S4	G10		121050				201	195		4200				3	2		17				0.002	0.001
